# Supplementary material for: Rational design using sequence information only produces a peptide that binds to the intrinsically disordered region of p53
Source: PubMed Central journal article supplement (PMC6599006; doi:10.1038/s41598-019-44688-0), 2019-06-28
Supplement: 41598_2019_44688_MOESM2_ESM.pdf [file 41598_2019_44688_MOESM2_ESM.pdf]

## Supplementary Data

### **Rational design using sequence information only produces a peptide that binds to the intrinsically disordered region of p53**

Kiyoto Kamagata<sup>1\*</sup>, Eriko Mano<sup>1</sup>, Yuji Itoh<sup>1,2</sup>, Takuro Wakamoto<sup>3</sup>, Ryo Kitahara<sup>4</sup>, Saori Kanbayashi<sup>1</sup>, Hiroto Takahashi<sup>1</sup>, Agato Murata<sup>1,2</sup>, and Tomoshi Kameda<sup>5\*</sup>

<sup>1</sup>Institute of Multidisciplinary Research for Advanced Materials, Tohoku University, Katahira 2-1-1, Aoba-ku, Sendai 980-8577, Japan

<sup>2</sup>Department of Chemistry, Graduate School of Science, Tohoku University, Sendai 980-8578, Japan

<sup>3</sup>College of Life Sciences, Ritsumeikan University, Kusatsu, 525-8577, Japan

<sup>4</sup>Department of Pharmaceutical Sciences, College of Pharmaceutical Sciences, Ritsumeikan University, Kusatsu, 525-8577, Japan

<sup>5</sup>Artificial Intelligence Research Center, National Institute of Advanced Industrial Science and Technology (AIST), Koto, Tokyo 135-0064, Japan

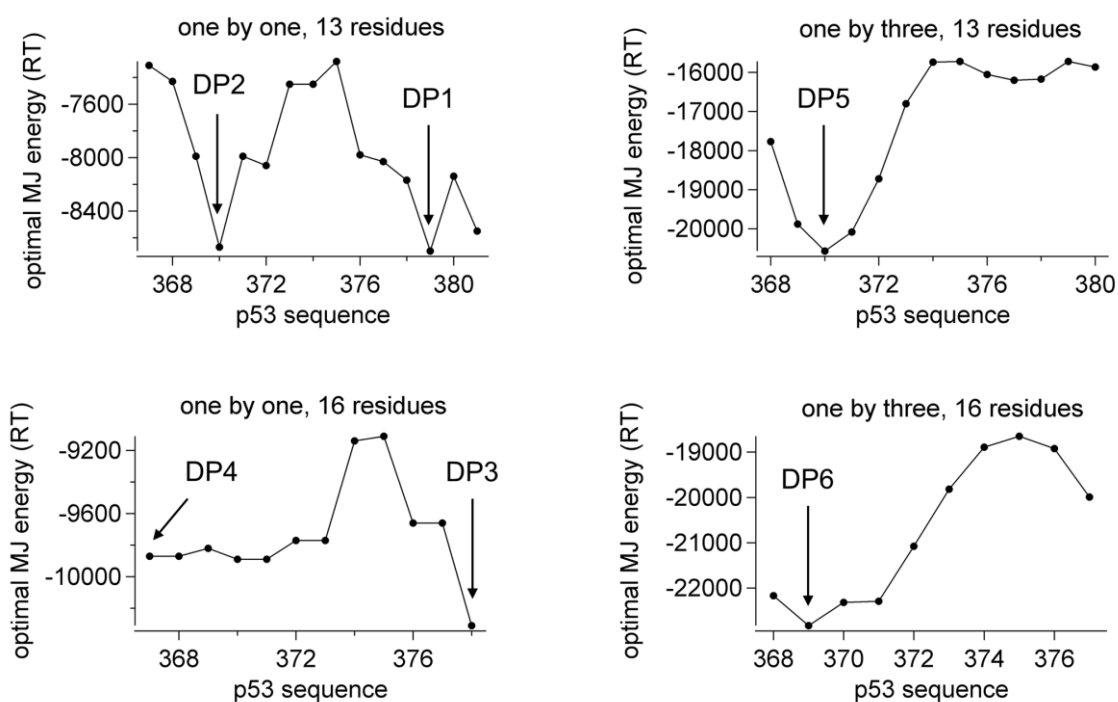

**Fig. S1.** Designed peptides were selected among the optimal peptide for each part of p53 sequence based on the Miyazawa-Jernigan (MJ) energy. The p53 sequence denotes the initial sequence number used for designing the complementary peptide. Lowest MJ binding energy of 13-residue or 16-residue peptide against p53 sequence was plotted considering one by one or one by three interactions. The arrows represent the designed peptides DP1–6.

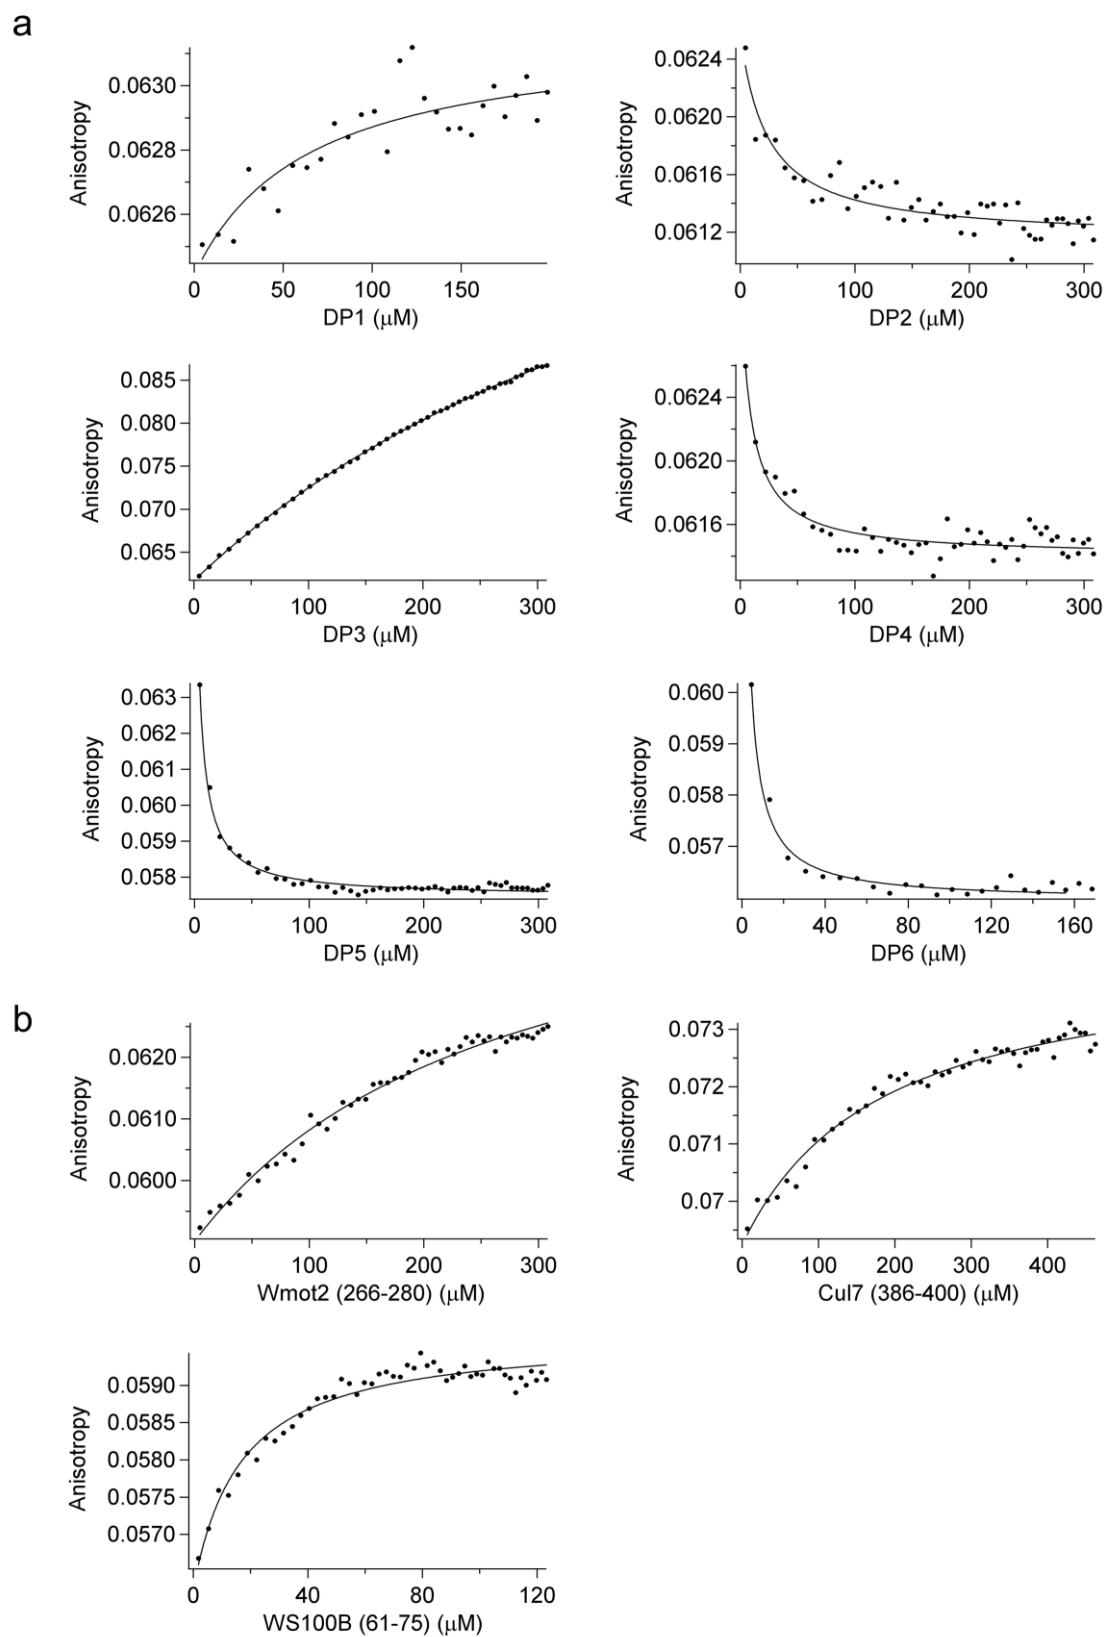

**Fig. S2.** Titration of designed peptides (a) or peptides from natural proteins <sup>1</sup>. (b) against

the CT domain of p53. Fluorescence anisotropy changes in the CT domain labeled with 6-FAM were monitored upon the addition of the peptides. The black curves were best fitted curves based on the one to one binding model.

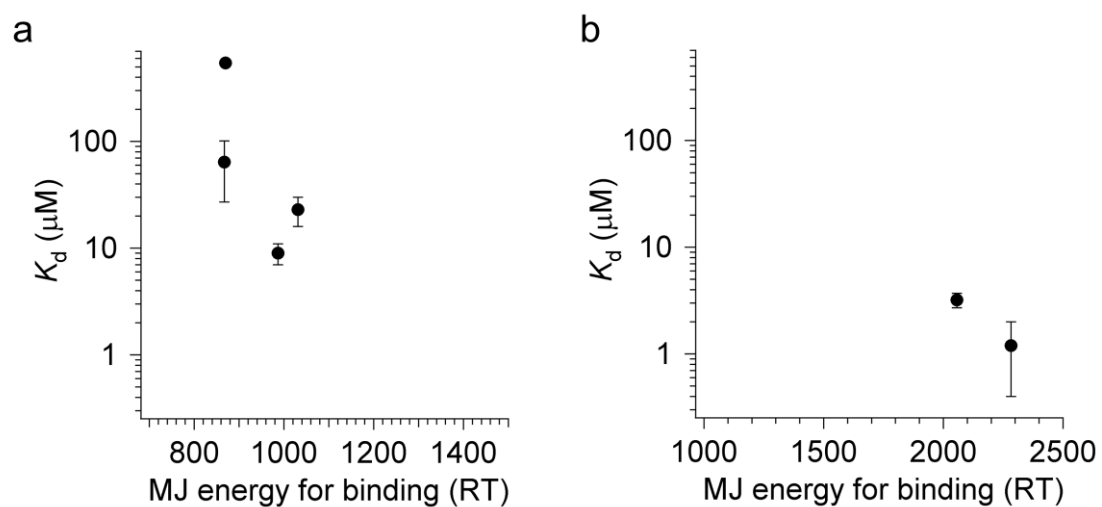

**Fig. S3.** MJ binding energy correlates with affinity for the designed peptide–CT domain complex. The binding energy was calculated considering one by one residue interaction for DP1–DP4 (a) or one by three residue interaction for DP5 and DP6 (b). The affinity was determined in the absence of KCl by monitoring the fluorescence anisotropy change in the CT domain labeled with 6-FAM. The error is the SEM of the fitting in the titration measurements.

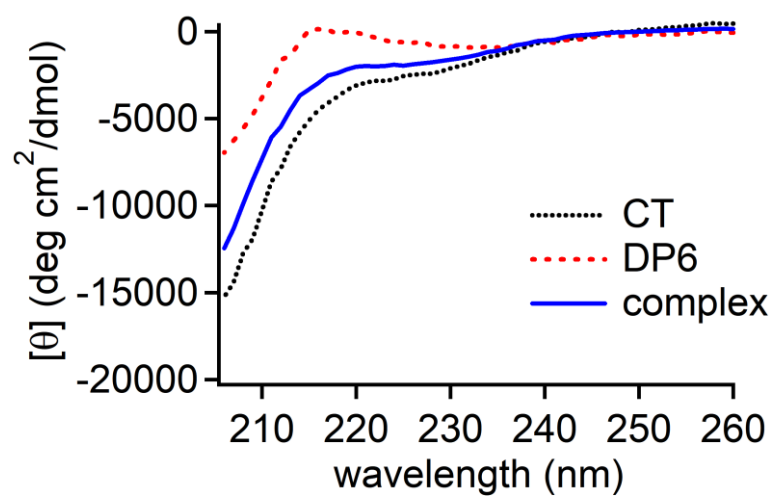

**Fig. S4.** DP6 and CT peptide of p53 do not form a secondary structure in the complex.

CD spectra of DP6 and CT peptides and the complex.

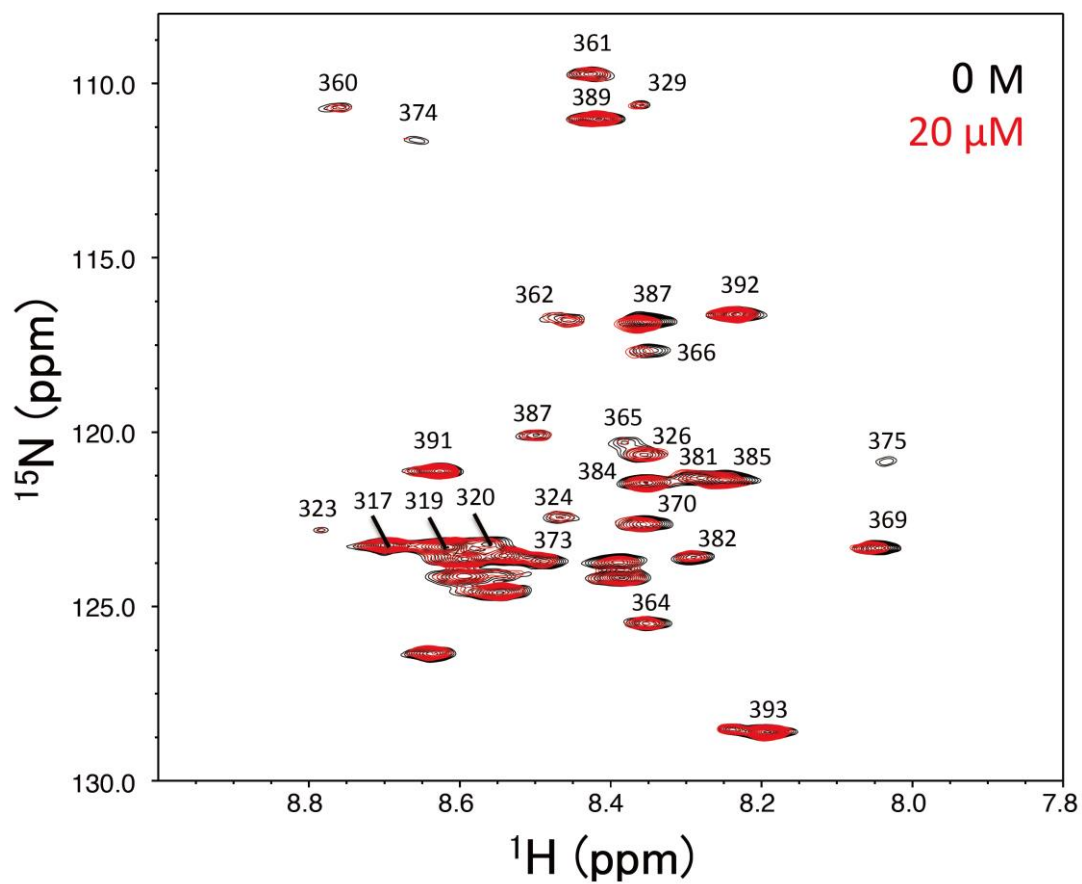

**Fig. S5.** Binding site of DP6 in p53 was identified using NMR.  $^1\text{H}/^{15}\text{N}$ -HSQC spectra of

$^{15}\text{N}$ -labeled tetrameric p53 (313–393) at 0  $\mu\text{M}$  (black) and 20  $\mu\text{M}$  (red) DP6.

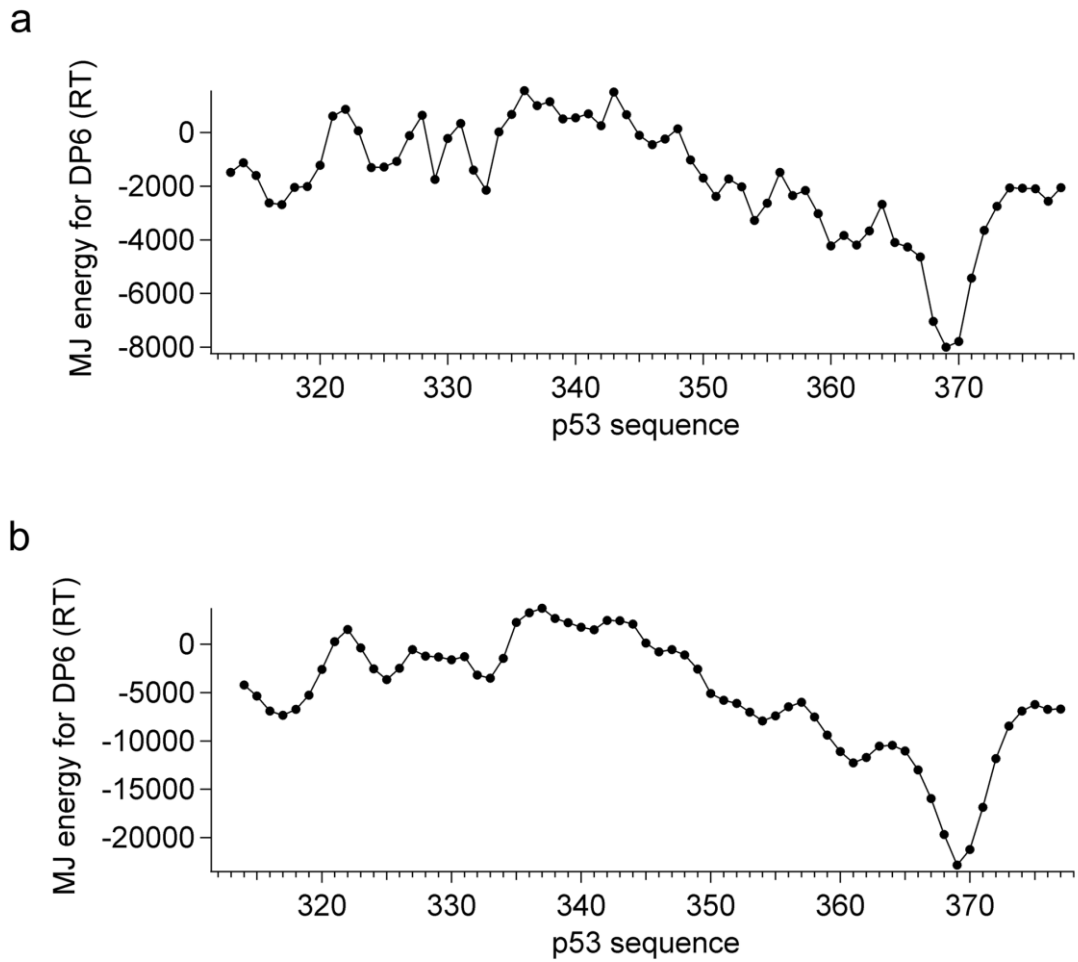

**Fig. S6.** MJ binding energy of DP6 to p53 is consistent with the binding site identified by NMR and MD simulation. MJ binding energy of DP6 to p53 sequence was calculated considering one by one interaction (a) or one by three interaction (b). MJ energy for DP6 against p53 sequence was calculated. The p53 sequence denotes the initial sequence number used for the calculation. Residue 368–371 in panel (a) and residue 366–372 in panel (b), representing the minimum of MJ energy landscape for binding to DP6, correspond to residue 368–386 and residue 366–387 in Fig. 2 of the main text, respectively.



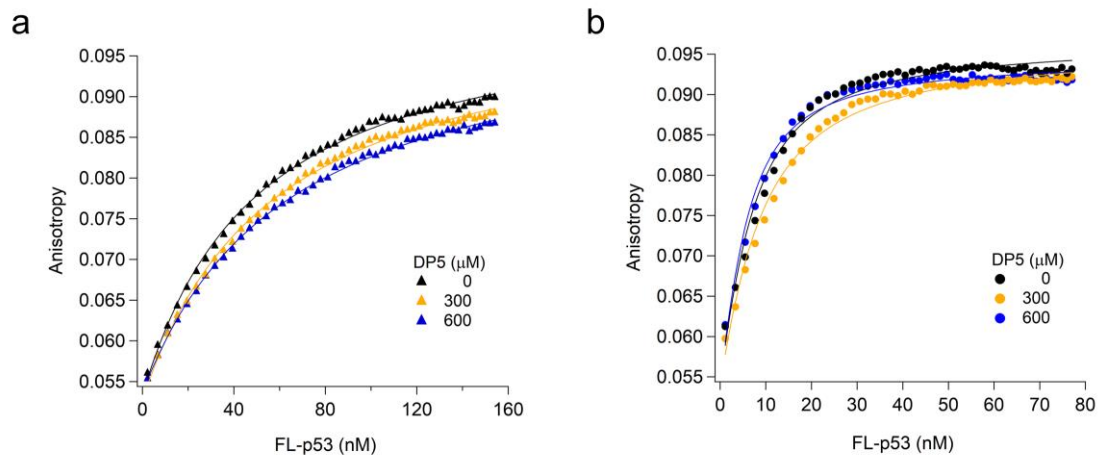

**Fig. S7.** Designed peptide DP5 does not affect the DNA binding of p53. (a) Titration of FL-p53 against nspDNA at various DP5 concentrations. (b) Titration of FL-p53 against spDNA at various DP5 concentrations. Tetramer concentrations are used for p53 mutants. Solid curves are best-fitted curves using Eqs. 1 and 2 in the main text.

**Table S1.** Dissociation constants of p53 mutants with specific and nonspecific DNAs in the presence of DP6.

| DP6 ( $\mu\text{M}$ ) | DNA             | p53 mutant | $K_d$ ( $\mu\text{M}$ ) <sup>a</sup> |
|-----------------------|-----------------|------------|--------------------------------------|
| 0                     | p21             | FL-p53     | $7.2 \pm 0.4$                        |
| 75                    | p21             | FL-p53     | $9.2 \pm 0.7$                        |
| 150                   | p21             | FL-p53     | $12.0 \pm 0.9$                       |
| 300                   | p21             | FL-p53     | $20 \pm 2$                           |
| 450                   | p21             | FL-p53     | $22 \pm 2$                           |
| 600                   | p21             | FL-p53     | $21 \pm 2$                           |
| 0                     | random sequence | FL-p53     | $24 \pm 2$                           |
| 75                    | random sequence | FL-p53     | $32 \pm 3$                           |
| 150                   | random sequence | FL-p53     | $57 \pm 5$                           |
| 300                   | random sequence | FL-p53     | $90 \pm 10$                          |
| 450                   | random sequence | FL-p53     | $130 \pm 20$                         |
| 600                   | random sequence | FL-p53     | $160 \pm 40$                         |
| 0                     | random sequence | TetCT      | $110 \pm 20$                         |
| 75                    | random sequence | TetCT      | $340 \pm 60$                         |
| 150                   | random sequence | TetCT      | n.d.                                 |
| 300                   | random sequence | TetCT      | n.d.                                 |
| 450                   | random sequence | TetCT      | n.d.                                 |
| 600                   | random sequence | TetCT      | n.d.                                 |
| 0                     | p21             | CoreTet    | $19 \pm 3$                           |
| 600                   | p21             | CoreTet    | $13 \pm 3$                           |
| 600                   | random sequence | CoreTet    | n.d.                                 |

<sup>a</sup> $K_d$  was determined by fitting the titration curves with Eqs. 1 and 2 in the main text. The error of  $K_d$  is the SEM of the fitting. n.d. represents data for which  $K_d$  was not determined.

**Table S2.** Dissociation constants of FL-p53 with specific and nonspecific DNAs in the presence of DP5.

| DP5 ( $\mu\text{M}$ ) | DNA             | $K_d$ ( $\mu\text{M}$ ) <sup>a</sup> |
|-----------------------|-----------------|--------------------------------------|
| 0                     | p21             | $6.6 \pm 0.4$                        |
| 300                   | p21             | $8.5 \pm 0.4$                        |
| 600                   | p21             | $5.3 \pm 0.3$                        |
| 0                     | random sequence | $49 \pm 2$                           |
| 300                   | random sequence | $55 \pm 2$                           |
| 600                   | random sequence | $61 \pm 2$                           |

<sup>a</sup>  $K_d$  was determined by fitting the titration curves with Eqs. 1 and 2 in the main text. The error of  $K_d$  is the SEM of the fitting.

**Table S3.** Fraction and diffusion coefficient of each sliding mode of FL-p53

| [DP6]<br>( $\mu\text{M}$ ) | Fraction (%) |            | $D$ of each mode ( $\mu\text{m}^2/\text{s}$ ) <sup>‡</sup> |                   | Averaged<br>( $\mu\text{m}^2/\text{s}$ ) <sup>§</sup> | $D$ |
|----------------------------|--------------|------------|------------------------------------------------------------|-------------------|-------------------------------------------------------|-----|
|                            | Fast         | Slow       | Fast                                                       | Slow              |                                                       |     |
| 0                          | $61 \pm 1$   | $39 \pm 2$ | $0.26 \pm 0.01$                                            | $0.032 \pm 0.003$ | $0.179 \pm 0.005$                                     |     |
| 300                        | $46 \pm 2$   | $54 \pm 1$ | $0.21 \pm 0.01$                                            | $0.030 \pm 0.002$ | $0.092 \pm 0.004$                                     |     |
| 600                        | $69 \pm 1$   | $31 \pm 2$ | $0.19 \pm 0.01$                                            | $0.026 \pm 0.004$ | $0.116 \pm 0.005$                                     |     |

<sup>‡</sup>  $D$  is the diffusion coefficient determined by the displacement analysis. <sup>§</sup>  $D$  is the diffusion coefficient determined by the MSD analysis.

Supplementary movie

Molecular dynamics simulation of DP6 and p53 (313–393) complex.

## References

1. Gabizon, R., et al. Specific Recognition of p53 Tetramers by Peptides Derived from p53 Interacting Proteins. *PLoS One* 7, e38060 (2012).
